# Supplementary material for: Extracellular Vesicles-Mediated Bio-Orthogonal Catalysis in Growing Tumors
Source: MDPI journal article supplement (doi:10.3390/cells13080691), 2024-04-16
Supplement: s1 [file s1]

## SUPPORTING INFORMATION

### Extracellular vesicles-mediated bio-orthogonal catalysis in growing tumors

Maria Sancho-Albero<sup>1,2,3,4,\*</sup>, Victor Sebastian<sup>1,2,3,4</sup>, Ana M. Perez-Lopez<sup>6,7,8</sup>, Pilar Martin-Duque<sup>1,3,5\*</sup>, Asier Unciti-Broceta<sup>6,7</sup>, and Jesus Santamaria<sup>1,2,3,4</sup>

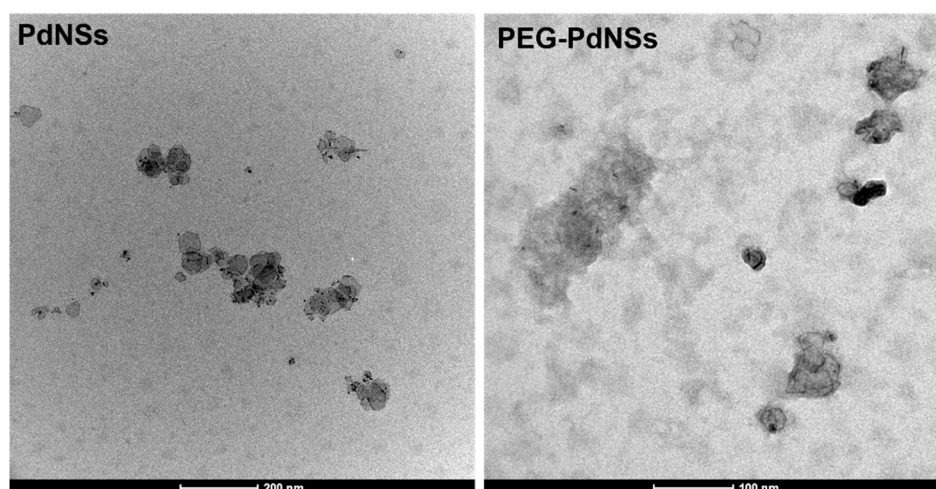

**Figure S1.** TEM images at lower magnification of PdNSs and PEG-PdNSs.

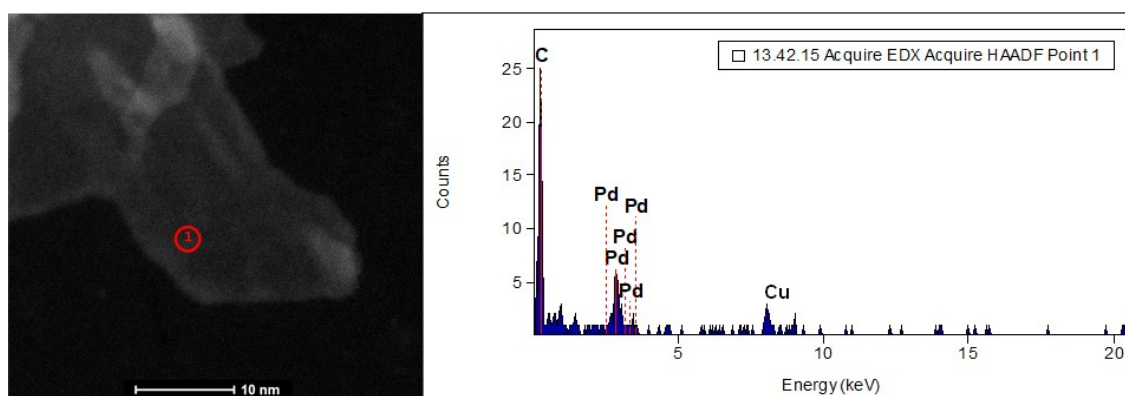

**Figure S2.** Energy-dispersive X-ray spectroscopy analysis (EDS) of a PdNSs to determine the presence of Pd in the nanostructures. EDS analysis was carried out in the marked area of the STEM-HAADF image.
